# Supplementary material for: Long-chain tin(iv) alkanethiolates (Sn(SCnH2n+1)4, n ≥ 12) with the coexistence of trans and gauche S–C bonds: a class of lamellar van der Waals molecular crystals
Source: Royal Society of Chemistry journal article supplement (doi:10.1039/d3ce00818e), 2023-01-01
Supplement: d3ce00818e1.pdf [file d3ce00818e1.pdf]

Electronic Supplementary Information (ESI)

**Long-chain tin(IV) alkanethiolates ( $\text{Sn}(\text{SC}_n\text{H}_{2n+1})_4$ ,  $n \geq 12$ ) with the coexistence of *trans* and *gauche* S–C bonds: a class of lamellar van der Waals molecular crystals**

Tingting Wang, Yixin Wan, Nan Yu, Kewei Gu, Zhiwei Lu, and Junli Wang\*

School of Materials Science & Engineering, Jiangsu University, Zhenjiang 212013, PR China.

E-mail: wangjl@ujs.edu.cn

## 1. Experimental section

### 1.1 Synthesis of polycrystalline solids

All chemicals were purchased from Aladdin Biochemical Technology Co., Ltd.: tin chloride pentahydrate ( $\text{SnCl}_4 \cdot 5\text{H}_2\text{O}$ , 99.0%, AR), 1-dodecanethiol ( $\text{C}_{12}\text{H}_{25}\text{SH}$ , 98%), 1-tetradecanethiol ( $\text{C}_{14}\text{H}_{29}\text{SH}$ , >97%), 1-hexadecanethiol ( $\text{C}_{16}\text{H}_{33}\text{SH}$ , >97%), 1-octadecanethiol ( $\text{C}_{18}\text{H}_{37}\text{SH}$ , 97%), and ethanol (>99.5%)

In a typical synthetic procedure of Sn(VI) alkanethiolates ( $\text{Sn}(\text{SC}_n\text{H}_{2n+1})_4$ ), 1 mmol (0.3506 g)  $\text{SnCl}_4 \cdot 5\text{H}_2\text{O}$  was dissolved in 3–5 mL of 1-alkanethiols ( $\text{HSC}_n\text{H}_{2n+1}$ ,  $n=12, 14, 16$  and 18) in a three-necked flask. The solution was heated to 120 °C and kept at this temperature for 30 min under magnetic stirring, which generates a colorless solution. When naturally cooled, white polycrystalline powders were obtained after the following processes: precipitated by adding ethanol into the mother solution, further purified by three times of chloroform dissolving, ethanol precipitation and centrifugation, and finally dried in a vacuum oven at room temperature. For the preparation of  $\text{Sn}(\text{SC}_{12}\text{H}_{25})_4$ , after the addition of ethanol, the solution of  $\text{Sn}(\text{SC}_{12}\text{H}_{25})_4$  was allowed to stand overnight (at room temperature or better in a 4 °C refrigerator) in order to flocculate its polycrystalline precipitate. The as-obtained Sn(VI) alkanethiolates could be well dissolved in chloroform or toluene and then precipitated again by adding ethanol.

We note that Stam and colleagues [1] reported the presence of  $\text{Sn}(\text{SC}_{12}\text{H}_{25})_4$  Sn(IV)–thiolate complex at the surface of  $\text{Cu}_{2-x}\text{S}$  colloidal nanocrystals by means of solid-state  $^{119}\text{Sn}$  NMR and that they used a synthetic protocol that adds  $\text{CuCl}$  and  $\text{SnBr}_4$  into a mixture of 1-dodecanethiol ( $\text{HSC}_{12}\text{H}_{25}$ ) and oleylamine to react at 225 °C. In this work, pure  $\text{Sn}(\text{SC}_{12}\text{H}_{25})_4$  was not isolated. Oleylamine may pollute Sn(IV)–thiolate complexes. Therefore, our synthesis of Sn(VI) alkanethiolates ( $\text{Sn}(\text{SC}_n\text{H}_{2n+1})_4$ ,  $n=12, 14, 16$  and 18) was performed in pure 1-alkanethiols. This synthetic method has been recently employed for preparing Bi(III) dodecanethiolate

(Bi(SC<sub>12</sub>H<sub>25</sub>)<sub>3</sub>, see Ref. 10).

[1] W. van der Stam, S. Gradmann, T. Altantzis, X. Ke, M. Baldus, S. Bals and C. de M. Donega, *Chem. Mater.*, 2016, **28**, 6705–6715.

## 1.2 Growth of single crystals

Growth of single crystals could be performed using two methods. One was the liquid-liquid diffusion method. An appropriate amount of Sn(VI) alkanethiolates was dissolved in 2 mL CHCl<sub>3</sub> and then transferred to a glass tube (diameter × length: 0.5 × 18 cm). Afterwards, 1 mL of CHCl<sub>3</sub>/EtOH (v:v=1:2) mixed solution was added as a transition layer and the rest of the tube was filled with EtOH. The culture tube was finally sealed with the parafilm (PM992) and placed in a dark, quiet environment. One or two holes could be made with a thin needle at the sealing parafilm in order to promote the evaporation of solvents and the diffusion of molecules. The colorless, transparent, flake-like crystals were obtained within 1 to 2 weeks (Fig. S7).

The other one was the solvent evaporation method. In brief, an appropriate amount of Sn(SC<sub>n</sub>H<sub>2n+1</sub>)<sub>4</sub> polycrystalline powders was dissolved in 2 mL CHCl<sub>3</sub>/EtOH (v:v=5:1–3:1) in a small sample bottle. This bottle was then placed in a larger glass bottle that contained 2–4 mL CHCl<sub>3</sub>/EtOH with a low v:v ratio (1:1). After the larger bottle was sealed, CHCl<sub>3</sub> would slowly evaporate to form supersaturated solution in the small bottle for growing single crystals. The bottles were placed in a dark, quiet environment. The colorless, transparent, flake-like crystals were obtained within 1 to 2 weeks. The volume capacities for the small and large bottles were 4 and 20 mL.

## 1.3 Characterizations

### Powder XRD

The powder XRD patterns of Sn(SC<sub>n</sub>H<sub>2n+1</sub>)<sub>4</sub> polycrystalline samples were collected in the range of 2–60° (2θ) on a Rigaku Ultimate IV X-ray diffractometer (Cu Kα radiation λ=1.5418 Å) operated at 40 KV and 40 mA. The powder XRD data of the SnS products were collected on a D8 Advance diffractometer with graphite-monochromatized Cu Kα radiation (λ=1.54178 Å, Bruker-AXS). All of the XRD data were collected at room temperature.

### Single crystal XRD

The single crystal data of Sn(SC<sub>12</sub>H<sub>25</sub>)<sub>4</sub> and Sn(SC<sub>14</sub>H<sub>29</sub>)<sub>4</sub> were collected at low temperature using a Bruker APEX-II CCD diffractometer with Cu Kα radiation (λ = 1.54184 Å). The single crystal data of Sn(SC<sub>16</sub>H<sub>33</sub>)<sub>4</sub> were collected at room temperature on a Bruker D8 Venture X-ray diffractometer with graphite monochromated Mo Kα radiation (λ = 0.71073 Å). Using Olex2 [1], the structures for three crystals were solved with the SHELXT [2] structure solution program using Intrinsic Phasing and refined with the SHELXL [3] refinement package using Least Squares minimization.

- [1] Dolomanov, O.V., Bourhis, L.J., Gildea, R.J, Howard, J.A.K. & Puschmann, H. (2009), *J. Appl. Cryst.* 42, 339-341.
- [2] Sheldrick, G.M. (2008). *Acta Cryst.* A64, 112-122.
- [3] Sheldrick, G.M. (2015). *Acta Cryst.* C71, 3-8.

### **FT-IR**

Fourier transform infrared spectra (FT-IR) recorded on a Nicolet FT-170SX Fourier transform spectrometer using an attenuated total reflection (ATR) model within the wavenumber range of 400–4000  $\text{cm}^{-1}$ .

### **TG-DSC**

A NETZSCH STA 449 F3 thermal analyzer was used to collect the thermogravimetry and differential scanning calorimetry (TG-DSC) data for the thermolysis of Sn(VI) alkanethiolates. The sample purge  $\text{N}_2$  flow was 60 mL/min and the flow of  $\text{N}_2$  protection was 20 mL. The heating rate was 10  $^\circ\text{C}/\text{min}$ .

### **DSC**

The DSC heating/cooling cycles of  $\text{Sn}(\text{SC}_n\text{H}_{2n+1})_4$  samples were recorded on SDT Q600 thermal analyzer in the temperature range of 0  $^\circ\text{C}$ –100  $^\circ\text{C}$ –0  $^\circ\text{C}$ . The purge  $\text{N}_2$  flow was 100 mL/min and the scanning rate was 10  $^\circ\text{C}/\text{min}$ .

## 2. Supporting figures

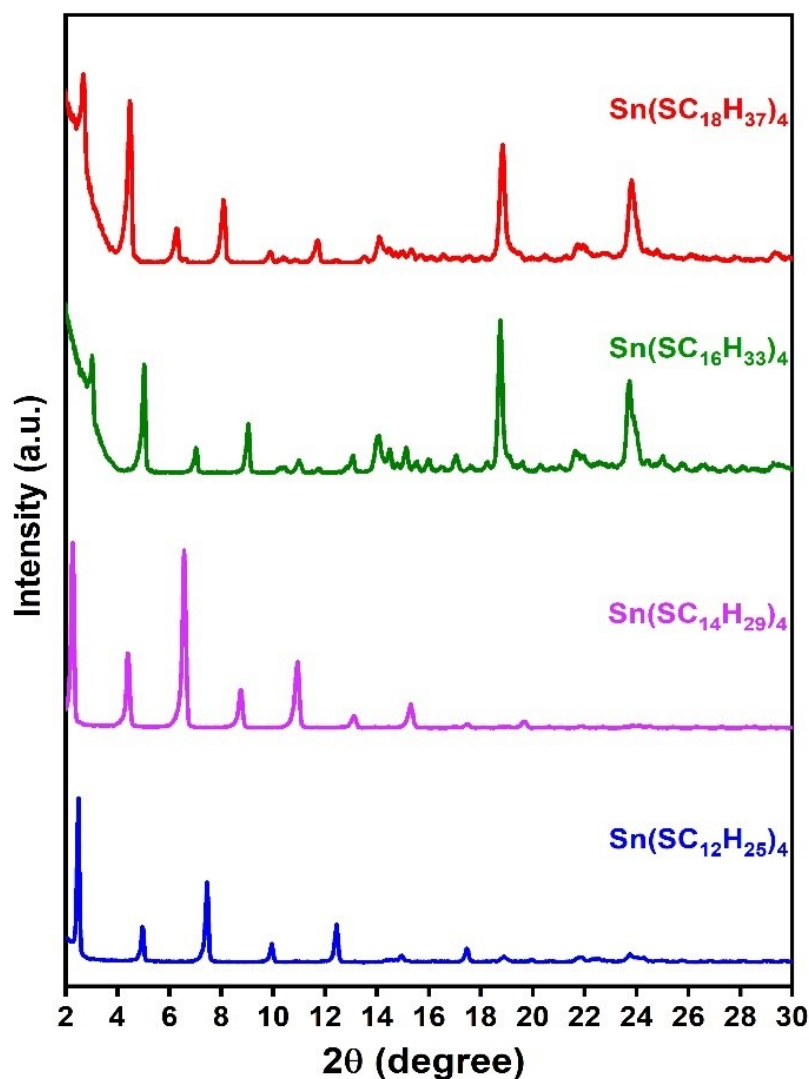

**Fig. S1** The p-XRD patterns recorded on  $(\text{Sn}(\text{SC}_n\text{H}_{2n+1})_4$  ( $n=12, 14, 16$  and  $18$ ) polycrystalline powders. As seen in other metal alkanethiolates (see refs. 3–11 and 14), a series of successive (h00) diffraction peaks with an equal spacing distance at the low  $2\theta$ -angle region are present, suggesting a layered crystal structure for  $(\text{Sn}(\text{SC}_n\text{H}_{2n+1})_4$  homologous crystals. It can be observed that the XRD profile of  $\text{Sn}(\text{SC}_{12}\text{H}_{25})_4$  is very similar to that of  $\text{Sn}(\text{SC}_{14}\text{H}_{29})_4$  while the XRD profile of  $\text{Sn}(\text{SC}_{16}\text{H}_{33})_4$  is very similar to that of  $\text{Sn}(\text{SC}_{18}\text{H}_{37})_4$ . A collective shift of diffraction lines to the small  $2\theta$ -angle positions occurs with the increase in the chain lengths of alkyl chains in  $\text{Sn}(\text{SC}_n\text{H}_{2n+1})_4$ .

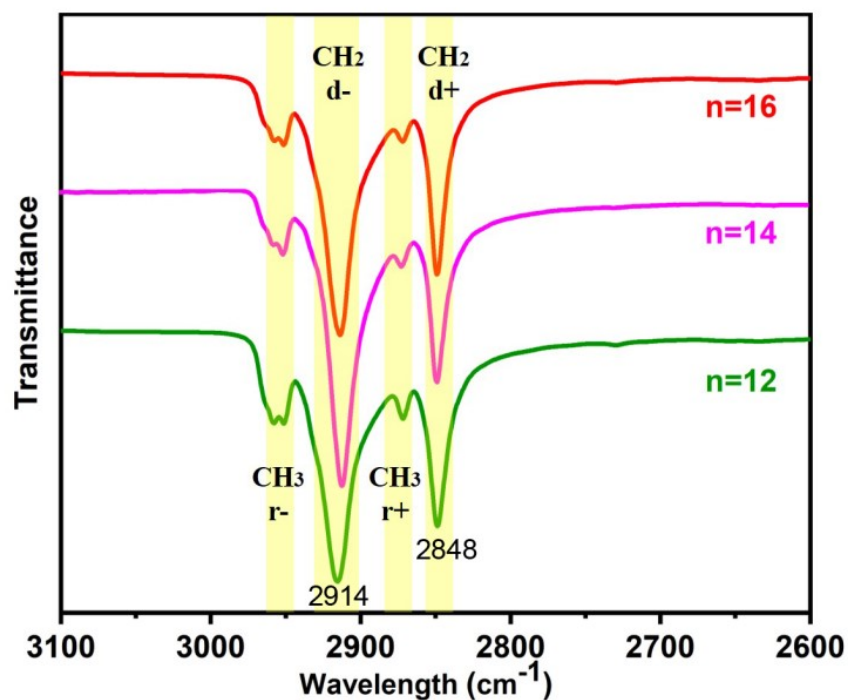

**Fig. S2** FTIR spectra recorded on  $(\text{Sn}(\text{SC}_n\text{H}_{2n+1})_4)$  ( $n = 12, 14$  and  $16$ ) polycrystalline powders. The presence of the strong symmetric (d+) and antisymmetric (d-)  $\text{CH}_2$  stretching bands with peak maxima around 2848 and 2914  $\text{cm}^{-1}$  indicates that long  $\text{C}_n\text{H}_{2n+1}$  chains have a fully extended, all-*trans* conformation (see refs. 4–6).

(a)  $P2_1/c$

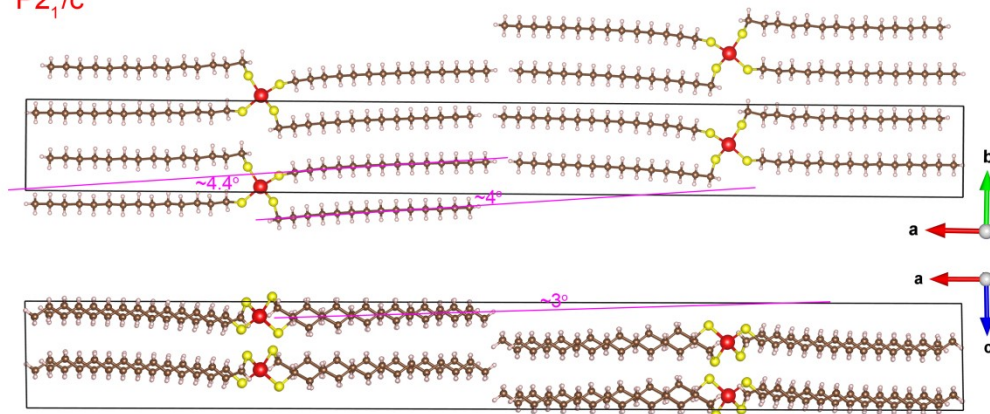

(b)  $Pc$

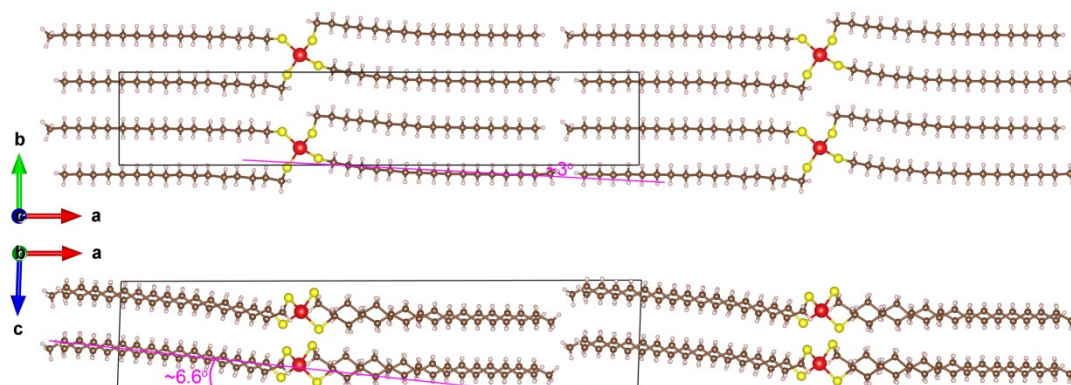

**Fig. S3** Schematic illustration for measuring the tilt angles of  $C_nH_{2n+1}$  chains relative to  $a$  axis. All  $C_nH_{2n+1}$  chains extend along  $a$  axis and their chain axes prefer to be parallel to  $a$  axis as possible as they can. In both unit cells, the maximum value for the tilt angles is below  $7^\circ$ . In the top figure of (a) and (b), the lower sublayer of  $Sn(SC_nH_{2n+1})_4$  molecules is omitted for a better observation.

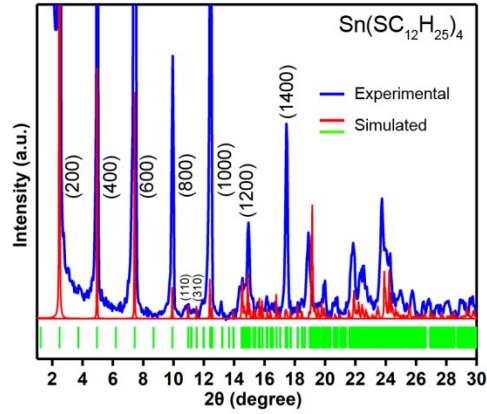

| No. | h  | k | l  | d (Å)    | F(real)  | F(Imag)    | F       | 2θ      | I        |
|-----|----|---|----|----------|----------|------------|---------|---------|----------|
| 1   | 1  | 0 | 0  | 71.39529 | -1.65602 | -0.0734221 | 1.65766 | 1.23648 | 0.0084   |
| 2   | 2  | 0 | 0  | 35.69465 | -359.567 | -30.2557   | 360.038 | 2.4731  | 100.0000 |
| 3   | 3  | 0 | 0  | 23.79643 | -2.03277 | 0.209293   | 2.04351 | 3.71001 | 0.0014   |
| 4   | 4  | 0 | 0  | 17.84732 | 205.449  | 29.2647    | 207.523 | 4.94735 | 8.2816   |
| 5   | 5  | 0 | 0  | 14.27786 | -5.97878 | -0.34379   | 5.98582 | 6.18527 | 0.0044   |
| 6   | 6  | 0 | 0  | 11.99522 | -316.415 | -28.1852   | 317.668 | 7.42391 | 8.5636   |
| 7   | 7  | 0 | 0  | 10.19547 | 2.6046   | 0.458331   | 2.64442 | 8.66342 | 0.0004   |
| 8   | 8  | 0 | 0  | 8.92366  | 165.732  | 26.3626    | 167.816 | 9.90395 | 1.3378   |
| 9   | 1  | 1 | 0  | 8.06798  | 85.1119  | 9.34713    | 85.6236 | 10.9574 | 0.5679   |
| 10  | 9  | 0 | 0  | 7.93214  | -3.64303 | -0.555285  | 3.68511 | 11.1456 | 0.0005   |
| 11  | 2  | 1 | 0  | 7.91772  | -10.1393 | -0.33474   | 10.1448 | 11.166  | 0.0077   |
| 12  | 3  | 1 | 0  | 7.68491  | -88.0226 | -9.26434   | 88.5088 | 11.5054 | 0.5498   |
| 13  | 4  | 1 | 0  | 7.39099  | -14.2910 | 0.567871   | 14.3031 | 11.9646 | 0.0133   |
| 14  | 10 | 0 | 0  | 7.13893  | -244.262 | -24.605    | 245.490 | 12.3886 | 1.8200   |
| 15  | 5  | 1 | 0  | 7.05838  | 86.5088  | 9.09712    | 86.9858 | 12.5306 | 0.4468   |
| 16  | 6  | 1 | 0  | 6.70698  | -13.1512 | -0.783646  | 13.1746 | 13.19   | 0.0092   |
| 17  | 11 | 0 | 0  | 6.48994  | 1.99437  | 0.627765   | 2.09804 | 13.6331 | 0.0001   |
| 18  | 7  | 1 | 0  | 6.35242  | -88.0972 | -8.86428   | 88.542  | 13.9297 | 0.3734   |
| 19  | 0  | 1 | 1  | 6.11500  | -100.92  | -12.0536   | 101.637 | 14.4734 | 0.4551   |
| 20  | 1  | 1 | -1 | 6.10092  | 162.295  | 18.4933    | 163.345 | 14.5069 | 1.1899   |
| 21  | 1  | 1 | 1  | 6.08450  | -162.468 | -18.0544   | 163.460 | 14.5463 | 1.1652   |
| 22  | 2  | 1 | -1 | 6.04315  | 115.238  | 12.2399    | 115.886 | 14.6464 | 0.5775   |
| 23  | 2  | 1 | 1  | 6.01136  | 78.7188  | 11.8466    | 79.6052 | 14.7242 | 0.2696   |
| 24  | 8  | 1 | 0  | 6.00577  | -40.7947 | 0.743131   | 40.8014 | 14.738  | 0.0707   |

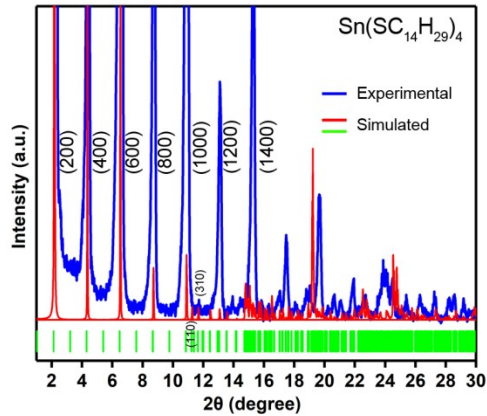

| No. | h  | k | l  | d (Å)    | F(real)  | F(Imag)    | F       | 2θ      | I        |
|-----|----|---|----|----------|----------|------------|---------|---------|----------|
| 1   | 1  | 0 | 0  | 81.14857 | -1.35137 | -0.0714646 | 1.35327 | 1.0875  | 0.0057   |
| 2   | 2  | 0 | 0  | 40.59429 | -359.509 | -30.3105   | 359.788 | 2.1751  | 100.0000 |
| 3   | 3  | 0 | 0  | 27.05619 | 1.81944  | 0.209413   | 1.83145 | 3.26289 | 0.0012   |
| 4   | 4  | 0 | 0  | 20.29214 | 212.039  | 29.489     | 214.08  | 4.35098 | 8.8368   |
| 5   | 5  | 0 | 0  | 16.23771 | -4.0438  | -0.341306  | 4.05581 | 5.43946 | 0.0029   |
| 6   | 6  | 0 | 0  | 13.52610 | -321.597 | -28.4523   | 322.871 | 6.52843 | 8.9093   |
| 7   | 7  | 0 | 0  | 11.99551 | 4.9639   | 0.455919   | 4.98479 | 7.61799 | 0.0016   |
| 8   | 8  | 0 | 0  | 10.14607 | 176.369  | 27.1319    | 178.444 | 8.70925 | 1.8250   |
| 9   | 9  | 0 | 0  | 9.01873  | -7.24347 | -0.555908  | 7.26477 | 9.79939 | 0.0020   |
| 10  | 10 | 0 | 0  | 8.11686  | -263.631 | -25.6905   | 264.879 | 10.8912 | 2.1401   |
| 11  | 1  | 1 | 0  | 7.85882  | 86.8186  | 9.10731    | 87.295  | 11.2615 | 0.4345   |
| 12  | 2  | 1 | 0  | 7.74291  | -3.62027 | -0.286071  | 3.70314 | 11.4189 | 0.0008   |
| 13  | 3  | 1 | 0  | 7.57256  | -87.969  | -9.04263   | 88.4326 | 11.6767 | 0.4144   |
| 14  | 11 | 0 | 0  | 7.37896  | 6.39968  | 0.631945   | 6.43081 | 11.9842 | 0.0010   |
| 15  | 4  | 1 | 0  | 7.35191  | -14.6911 | 0.504104   | 14.6997 | 12.0284 | 0.0108   |
| 16  | 5  | 1 | 0  | 7.09465  | 86.2375  | 8.91228    | 86.6960 | 12.4663 | 0.3489   |
| 17  | 6  | 1 | 0  | 6.81410  | -8.8891  | -0.722209  | 8.91399 | 12.9817 | 0.0034   |
| 18  | 12 | 0 | 0  | 6.76405  | 130.341  | 23.7555    | 132.488 | 13.0782 | 0.3696   |
| 19  | 7  | 1 | 0  | 6.52188  | -85.1317 | -8.72675   | 85.5778 | 13.566  | 0.2863   |
| 20  | 13 | 0 | 0  | 6.24374  | -7.50035 | -0.69101   | 7.54000 | 14.1734 | 0.0010   |
| 21  | 8  | 1 | 0  | 6.22732  | -33.7624 | 0.746509   | 33.7706 | 14.211  | 0.4046   |
| 22  | 0  | 1 | 1  | 6.00226  | 127.496  | 14.019     | 128.264 | 14.7467 | 0.5427   |
| 23  | 1  | 1 | -1 | 5.99149  | -139.396 | -16.7527   | 140.399 | 14.7734 | 0.6479   |
| 24  | 1  | 1 | 1  | 5.98035  | 151.086  | 16.4049    | 151.974 | 14.801  | 0.7563   |

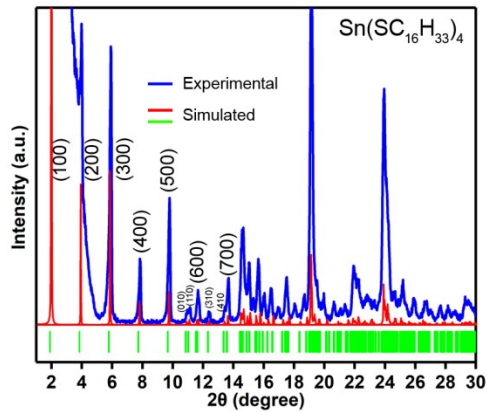

| No. | h  | k | l | d (Å)    | F(real)  | F(Imag)  | F       | 2θ      | I        |
|-----|----|---|---|----------|----------|----------|---------|---------|----------|
| 1   | -1 | 0 | 0 | 45.61307 | -93.8964 | -160.974 | 186.357 | 1.93527 | 100.0000 |
| 2   | 1  | 0 | 0 | 45.61307 | -118.709 | 143.451  | 186.199 | 1.93527 | 99.8302  |
| 3   | -2 | 0 | 0 | 22.80654 | -47.7724 | 94.4956  | 105.885 | 3.87109 | 8.8604   |
| 4   | 2  | 0 | 0 | 22.80654 | -19.7926 | -104.419 | 106.279 | 3.87109 | 8.1205   |
| 5   | 3  | 0 | 0 | 15.20436 | 160.067  | 62.5425  | 171.051 | 5.80802 | 9.4164   |
| 6   | -3 | 0 | 0 | 15.20436 | 167.945  | -34.5189 | 171.456 | 5.80802 | 9.3731   |
| 7   | -4 | 0 | 0 | 11.40327 | -62.0155 | -66.9492 | 91.2586 | 7.74662 | 1.4892   |
| 8   | 4  | 0 | 0 | 11.40327 | -79.5849 | 45.3161  | 91.5822 | 7.74662 | 1.4898   |
| 9   | -5 | 0 | 0 | 9.12261  | -26.0301 | 143.161  | 148.509 | 9.69743 | 2.4137   |
| 10  | 5  | 0 | 0 | 9.12261  | 0.693495 | -144.978 | 144.979 | 9.69743 | 2.3962   |
| 11  | 0  | 1 | 0 | 8.13350  | 50.4216  | 5.00491  | 50.6694 | 10.0689 | 0.4640   |
| 12  | -1 | 1 | 0 | 8.00720  | -23.9459 | -40.6237 | 47.156  | 11.0400 | 0.3894   |
| 13  | 1  | 1 | 0 | 8.00720  | -31.9642 | 34.6932  | 47.1734 | 11.0400 | 0.3897   |
| 14  | -2 | 1 | 0 | 7.66090  | -26.5646 | 42.4464  | 50.0737 | 11.5416 | 0.4014   |
| 15  | 2  | 1 | 0 | 7.66090  | -17.1184 | -45.3847 | 48.5057 | 11.5416 | 0.3766   |
| 16  | -6 | 0 | 0 | 7.60218  | 66.4852  | -29.3653 | 72.6815 | 11.631  | 0.4163   |
| 17  | 6  | 0 | 0 | 7.60218  | 53.3887  | 50.8666  | 73.7412 | 11.631  | 0.4285   |
| 18  | -3 | 1 | 0 | 7.17181  | 45.897   | -11.0849 | 47.2167 | 12.3316 | 0.3121   |
| 19  | 3  | 1 | 0 | 7.17181  | 42.7165  | 20.3033  | 47.2962 | 12.3316 | 0.3077   |
| 20  | -4 | 1 | 0 | 6.62171  | -23.7404 | -44.9706 | 50.8524 | 13.3606 | 0.2666   |
| 21  | 4  | 1 | 0 | 6.62171  | -29.2854 | 37.1872  | 47.3342 | 13.3606 | 0.2677   |
| 22  | 7  | 0 | 0 | 6.51615  | -107.92  | 34.4878  | 113.296 | 13.578  | 0.7390   |
| 23  | -7 | 0 | 0 | 6.51615  | -98.4446 | -56.2969 | 113.405 | 13.578  | 0.7404   |
| 24  | 0  | 1 | 1 | 6.12542  | 95.1675  | 22.78    | 97.856  | 14.4486 | 0.9717   |

**Fig. S4** (Left) The fitting results of the lab-experimental p-XRD patterns recorded on polycrystalline solids with the simulated p-XRD patterns derived from single crystals. (Right) The diffraction lines within  $2\theta=1-14^\circ$  of simulated p-XRD patterns are provided for information. The diffraction peaks with too weak intensity (I) are invisible in p-XRD patterns.

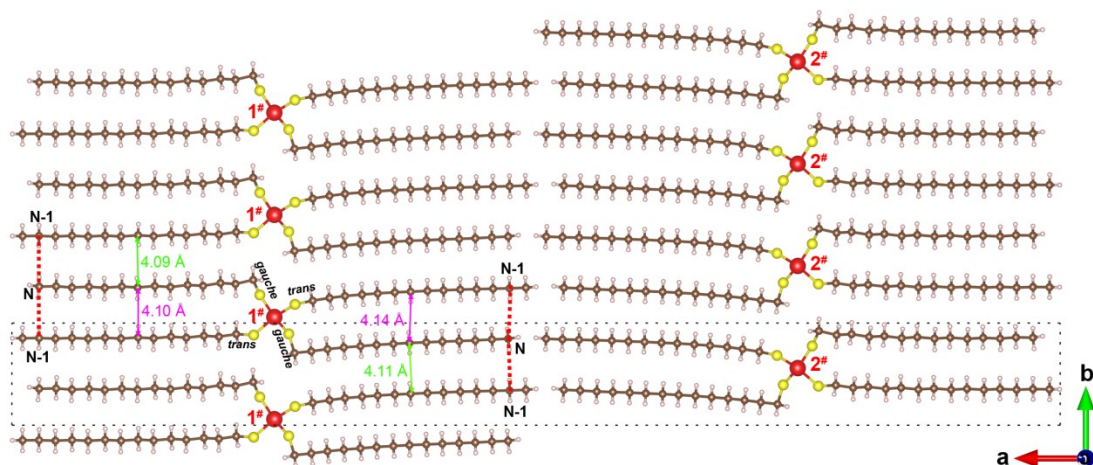

**Fig. S5** Schematic illustration for measuring the closest intramolecular and intermolecular chain-chain distances in  $\text{Sn}(\text{SC}_n\text{H}_{2n+1})_4$  crystals. It can be observed that the *trans* S-bonded  $\text{C}_n\text{H}_{2n+1}$  chain bulges out by one nonbonded  $\text{C}\cdots\text{C}$  distance along the *a* axis direction relative to the *gauche* S-bonded  $\text{C}_n\text{H}_{2n+1}$  chain. The average value for interchain  $\text{C}\cdots\text{C}$  spacings, which are measured between the *N*th C atom in *gauche* S-bonded  $\text{C}_n\text{H}_{2n+1}$  chain and the (*N*-1)th C atom in *trans* S-bonded  $\text{C}_n\text{H}_{2n+1}$  chain ( $N=2$  to  $n$ , red dotted lines), is used to assess the linear distance (marked with double-headed arrows) between two intramolecular (or intermolecular) neighboring alkyl chains. Taking  $n=14$  as an example, *N* ranges from 2 to 14, and then the intramolecular vs intermolecular chain-chain distances are calculated as follows: 4.12 vs 4.10 Å. This method is also applicable to  $n=12$  and 16.



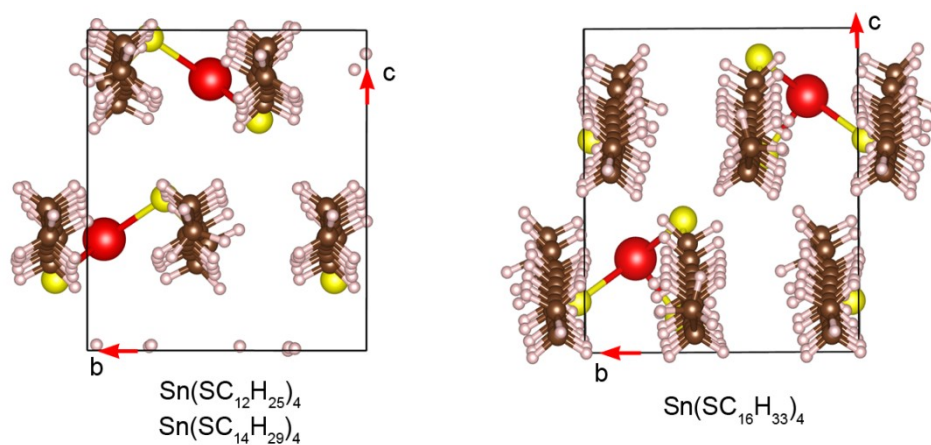

**Fig. S6** Unit cells of  $\text{Sn}(\text{SC}_n\text{H}_{2n+1})_4$  crystals projected from  $a$  axis, where there are four  $\text{C}_n\text{H}_{2n+1}$  chains extending within the  $bc$  plane. Other alkyl chains and Sn/S atoms are omitted for a better observation.

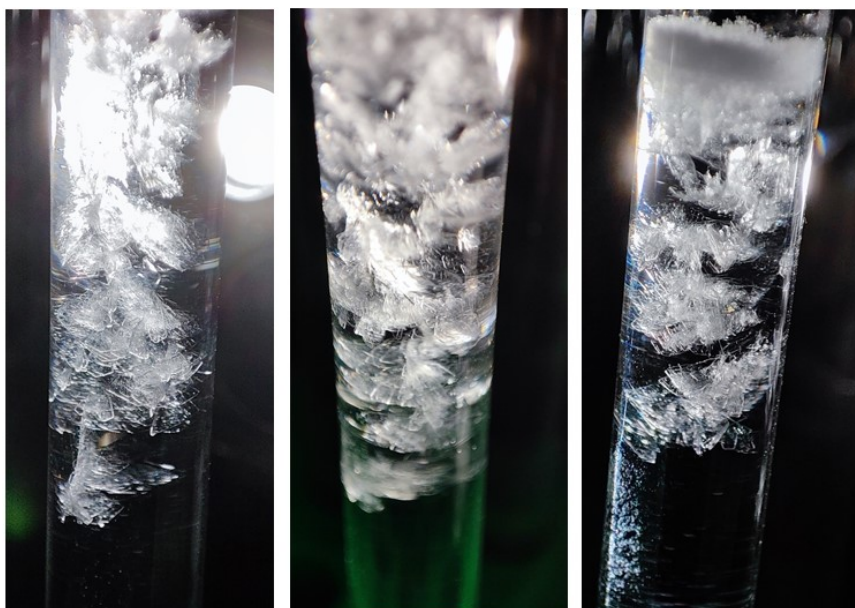

**Fig. S7** Optical graphics of  $\text{Sn}(\text{SC}_n\text{H}_{2n+1})_4$  single crystals grown by a layering diffusion method in  $\text{CHCl}_3/\text{EtOH}$ . From left to right are  $\text{Sn}(\text{SC}_{12}\text{H}_{25})_4$ ,  $\text{Sn}(\text{SC}_{14}\text{H}_{29})_4$  and  $\text{Sn}(\text{SC}_{16}\text{H}_{33})_4$ .

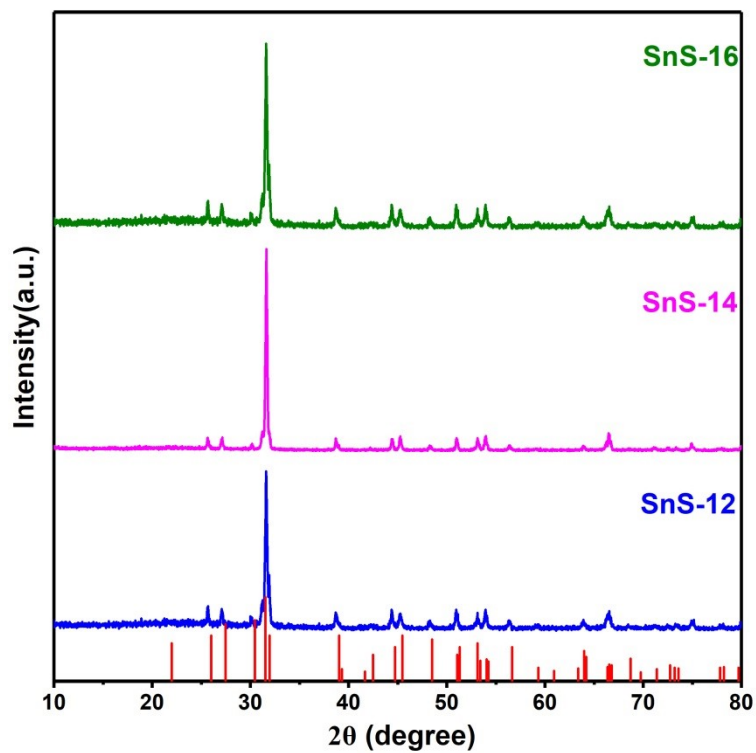

**Fig. S8** p-XRD patterns recorded on the solid products obtained from  $\text{Sn}(\text{SC}_n\text{H}_{2n+1})_4$  thermal decomposition, all of which are in good agreement with the standard diffraction lines for SnS (shown in red at the bottom, PDF# 73-1859).

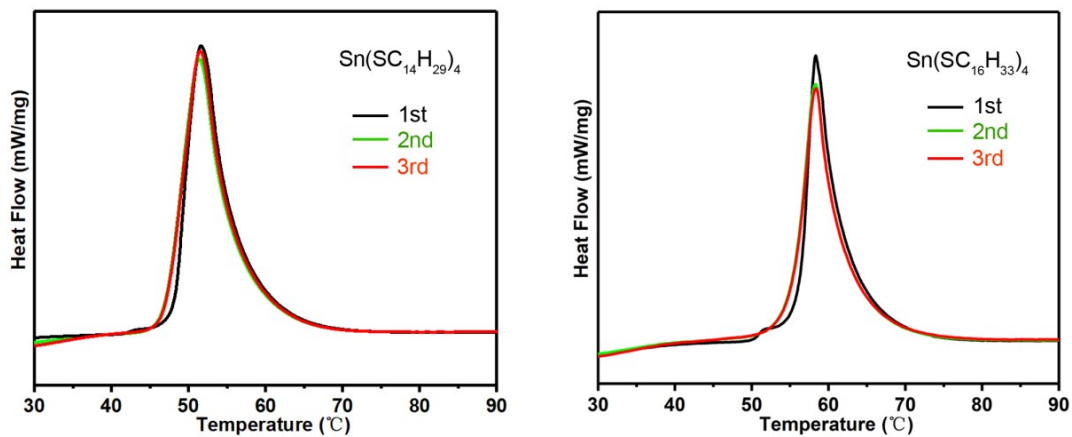

**Fig. S9** Multiple DSC melting point measurements for  $\text{Sn}(\text{SC}_n\text{H}_{2n+1})_4$ . Almost the same melting temperatures are confirmed for each crystal.

### 3. Supporting tables

**Table S1** Sn–S and S–C bond lengths (Å) and ∠S–Sn–S angles (°) in Sn(SC<sub>n</sub>H<sub>2n+1</sub>)<sub>4</sub> (n=12, 14 and 16) crystals.

| <b>Bond lengths</b> | <b>Sn(SC<sub>12</sub>H<sub>25</sub>)<sub>4</sub></b> | <b>Sn(SC<sub>14</sub>H<sub>29</sub>)<sub>4</sub></b> | <b>Sn(SC<sub>16</sub>H<sub>33</sub>)<sub>4</sub></b> |
|---------------------|------------------------------------------------------|------------------------------------------------------|------------------------------------------------------|
| Sn–S(1)             | 2.432(8)                                             | 2.3857(9)                                            | 2.376(3)                                             |
| Sn–S(2)             | 2.417(9)                                             | 2.4056(9)                                            | 2.402(3)                                             |
| Sn–S(3)             | 2.425(9)                                             | 2.3955(9)                                            | 2.381(3)                                             |
| Sn–S(4)             | 2.413(9)                                             | 2.3891(10)                                           | 2.407(3)                                             |
| S(1)–C              | 1.86(2)                                              | 1.836(4)                                             | 1.849(13)                                            |
| S(2)–C              | 1.86(2)                                              | 1.835(4)                                             | 1.849(16)                                            |
| S(3)–C              | 1.87(2)                                              | 1.832(4)                                             | 1.808(17)                                            |
| S(4)–C              | 1.86(2)                                              | 1.833(4)                                             | 1.843(10)                                            |
| <b>Angles</b>       |                                                      |                                                      |                                                      |
| S(1)–Sn–S(2)        | 108.0(3)                                             | 110.18(3)                                            | 110.37(11)                                           |
| S(1)–Sn–S(3)        | 110.3(3)                                             | 110.12(3)                                            | 110.54(11)                                           |
| S(1)–Sn–S(4)        | 113.2(3)                                             | 104.51(3)                                            | 111.76(11)                                           |
| S(2)–Sn–S(3)        | 104.9(3)                                             | 112.98(3)                                            | 103.81(11)                                           |
| S(2)–Sn–S(4)        | 110.5(3)                                             | 108.83(4)                                            | 109.03(12)                                           |
| S(3)–Sn–S(4)        | 109.5(4)                                             | 109.88(3)                                            | 111.03(11)                                           |

**Notes:**

Sn(SC<sub>12</sub>H<sub>25</sub>)<sub>4</sub> and Sn(SC<sub>16</sub>H<sub>33</sub>)<sub>4</sub>: S(1) and S(4) in *trans* conformation; S(2) and S(3) in *gauche* conformation.

Sn(SC<sub>14</sub>H<sub>29</sub>)<sub>4</sub>: S(2) and S(3) in *trans* conformation; S(1) and S(4) in *gauche* conformation.

**Table S2** Crystallographic data for Sn(SC<sub>n</sub>H<sub>2n+1</sub>)<sub>4</sub> (n=12, 14 and 16) crystals.

| Chemical formula                            | *Sn(SC <sub>12</sub> H <sub>25</sub> ) <sub>4</sub>            | Sn(SC <sub>14</sub> H <sub>29</sub> ) <sub>4</sub>              | Sn(SC <sub>16</sub> H <sub>33</sub> ) <sub>4</sub>              |
|---------------------------------------------|----------------------------------------------------------------|-----------------------------------------------------------------|-----------------------------------------------------------------|
| Formula weight                              | 924.20                                                         | 1036.41                                                         | 1148.62                                                         |
| Temperature/K                               | 160.00                                                         | 150.00                                                          | 100.00                                                          |
| Crystal system                              | monoclinic                                                     | monoclinic                                                      | monoclinic                                                      |
| Space group                                 | P2 <sub>1</sub> /c                                             | P2 <sub>1</sub> /c                                              | Pc                                                              |
| a/Å                                         | 71.41(10)                                                      | 81.184(4)                                                       | 45.6447(14)                                                     |
| b/Å                                         | 8.120(11)                                                      | 7.8878(4)                                                       | 8.1335(3)                                                       |
| c/Å                                         | 9.297(14)                                                      | 9.2530(5)                                                       | 9.3171(3)                                                       |
| α/°                                         | 90                                                             | 90                                                              | 90                                                              |
| β/°                                         | 91.38(4)                                                       | 91.1170(10)                                                     | 92.133(3)                                                       |
| γ/°                                         | 90                                                             | 90                                                              | 90                                                              |
| Volume/Å <sup>3</sup>                       | 5389(13)                                                       | 5924.2(5)                                                       | 3456.6(2)                                                       |
| Z                                           | 4                                                              | 4                                                               | 2                                                               |
| ρ <sub>calc</sub> /g/cm <sup>3</sup>        | 1.139                                                          | 1.162                                                           | 1.104                                                           |
| μ/mm <sup>-1</sup>                          | 5.408                                                          | 4.969                                                           | 0.524                                                           |
| F(000)                                      | 2008.0                                                         | 2264.0                                                          | 1260.0                                                          |
| Radiation                                   | Cu Kα<br>(λ=1.54178)                                           | Cu Kα<br>(λ=1.54178)                                            | Mo Kα<br>(λ=0.71073)                                            |
| 2θ range for data collection                | 3.712 to 133.152                                               | 3.266 to 149.35                                                 | 4.374 to 59.506                                                 |
| Index ranges                                | -84 ≤ h ≤ 82<br>-8 ≤ k ≤ 8<br>-4 ≤ l ≤ 11                      | -99 ≤ h ≤ 101<br>-9 ≤ k ≤ 9<br>-11 ≤ l ≤ 11                     | -57 ≤ h ≤ 63<br>-11 ≤ k ≤ 11<br>-13 ≤ l ≤ 12                    |
| Reflections collected                       | 8786                                                           | 46808                                                           | 60728                                                           |
| Independent reflections                     | 6720<br>R <sub>int</sub> =0.0615<br>R <sub>sigma</sub> =0.0963 | 12081<br>R <sub>int</sub> =0.0320<br>R <sub>sigma</sub> =0.0338 | 17139<br>R <sub>int</sub> =0.0798<br>R <sub>sigma</sub> =0.0669 |
| Data/restraints/parameters                  | 6720/368/482                                                   | 12081/0/554                                                     | 17139/110/630                                                   |
| Goodness-of-fit on F <sup>2</sup>           | 1.156                                                          | 1.187                                                           | 1.112                                                           |
| Final R indexes [I ≥ 2σ(I)]                 | R <sub>1</sub> = 0.2477<br>wR <sub>2</sub> = 0.5687            | R <sub>1</sub> = 0.0620<br>wR <sub>2</sub> = 0.1648             | R <sub>1</sub> = 0.0809<br>wR <sub>2</sub> = 0.2176             |
| Final R indexes [all data]                  | R <sub>1</sub> = 0.2569<br>wR <sub>2</sub> = 0.5722            | R <sub>1</sub> = 0.0639<br>wR <sub>2</sub> = 0.1672             | R <sub>1</sub> = 0.0846<br>wR <sub>2</sub> = 0.2241             |
| Largest diff. peak/hole / e Å <sup>-3</sup> | 2.18/-5.34                                                     | 1.47/-0.85                                                      | 1.22/-0.91                                                      |

**\*The reasons for large  $R_1$  and  $wR_2$  values for  $\text{Sn}(\text{SC}_{12}\text{H}_{25})_4$  are as follows: 1) the quality of single crystal is not good enough, 2) the data is not completely collected. Although we have tried our best to grow  $\text{Sn}(\text{SC}_{12}\text{H}_{25})_4$  single crystals and carried out sc-XRD data collection on different X-ray diffractometers for no less than 10 times, we cannot obtain better results than the ones shown above. While the crystallographic data for  $\text{Sn}(\text{SC}_{14}\text{H}_{29})_4$  and  $\text{Sn}(\text{SC}_{16}\text{H}_{33})_4$  crystals were well collected and analyzed, there are some A and B-level alerts that cannot be removed in solving single-crystal structures of  $\text{Sn}(\text{SC}_{12}\text{H}_{25})_4$ . However, the simulated p-XRD of its single crystal data is highly consistent with the lab-experimental p-XRD recorded on its polycrystals (Fig. S4), indicating that sufficient and reliable atom-resolution structural information can be obtained from single crystal crystallographic data (see details in the supplementary files of crystal data and CheckCIF reports).**
